# Supplementary material for: Shared ecological traits influence shape of the skeleton in flatfishes (Pleuronectiformes)
Source: PeerJ journal article supplement (doi:10.7717/peerj.8919), 2020-04-03
Supplement: Supplemental_Figure_S1.pdf [file Supplemental_Figure_S1.pdf]

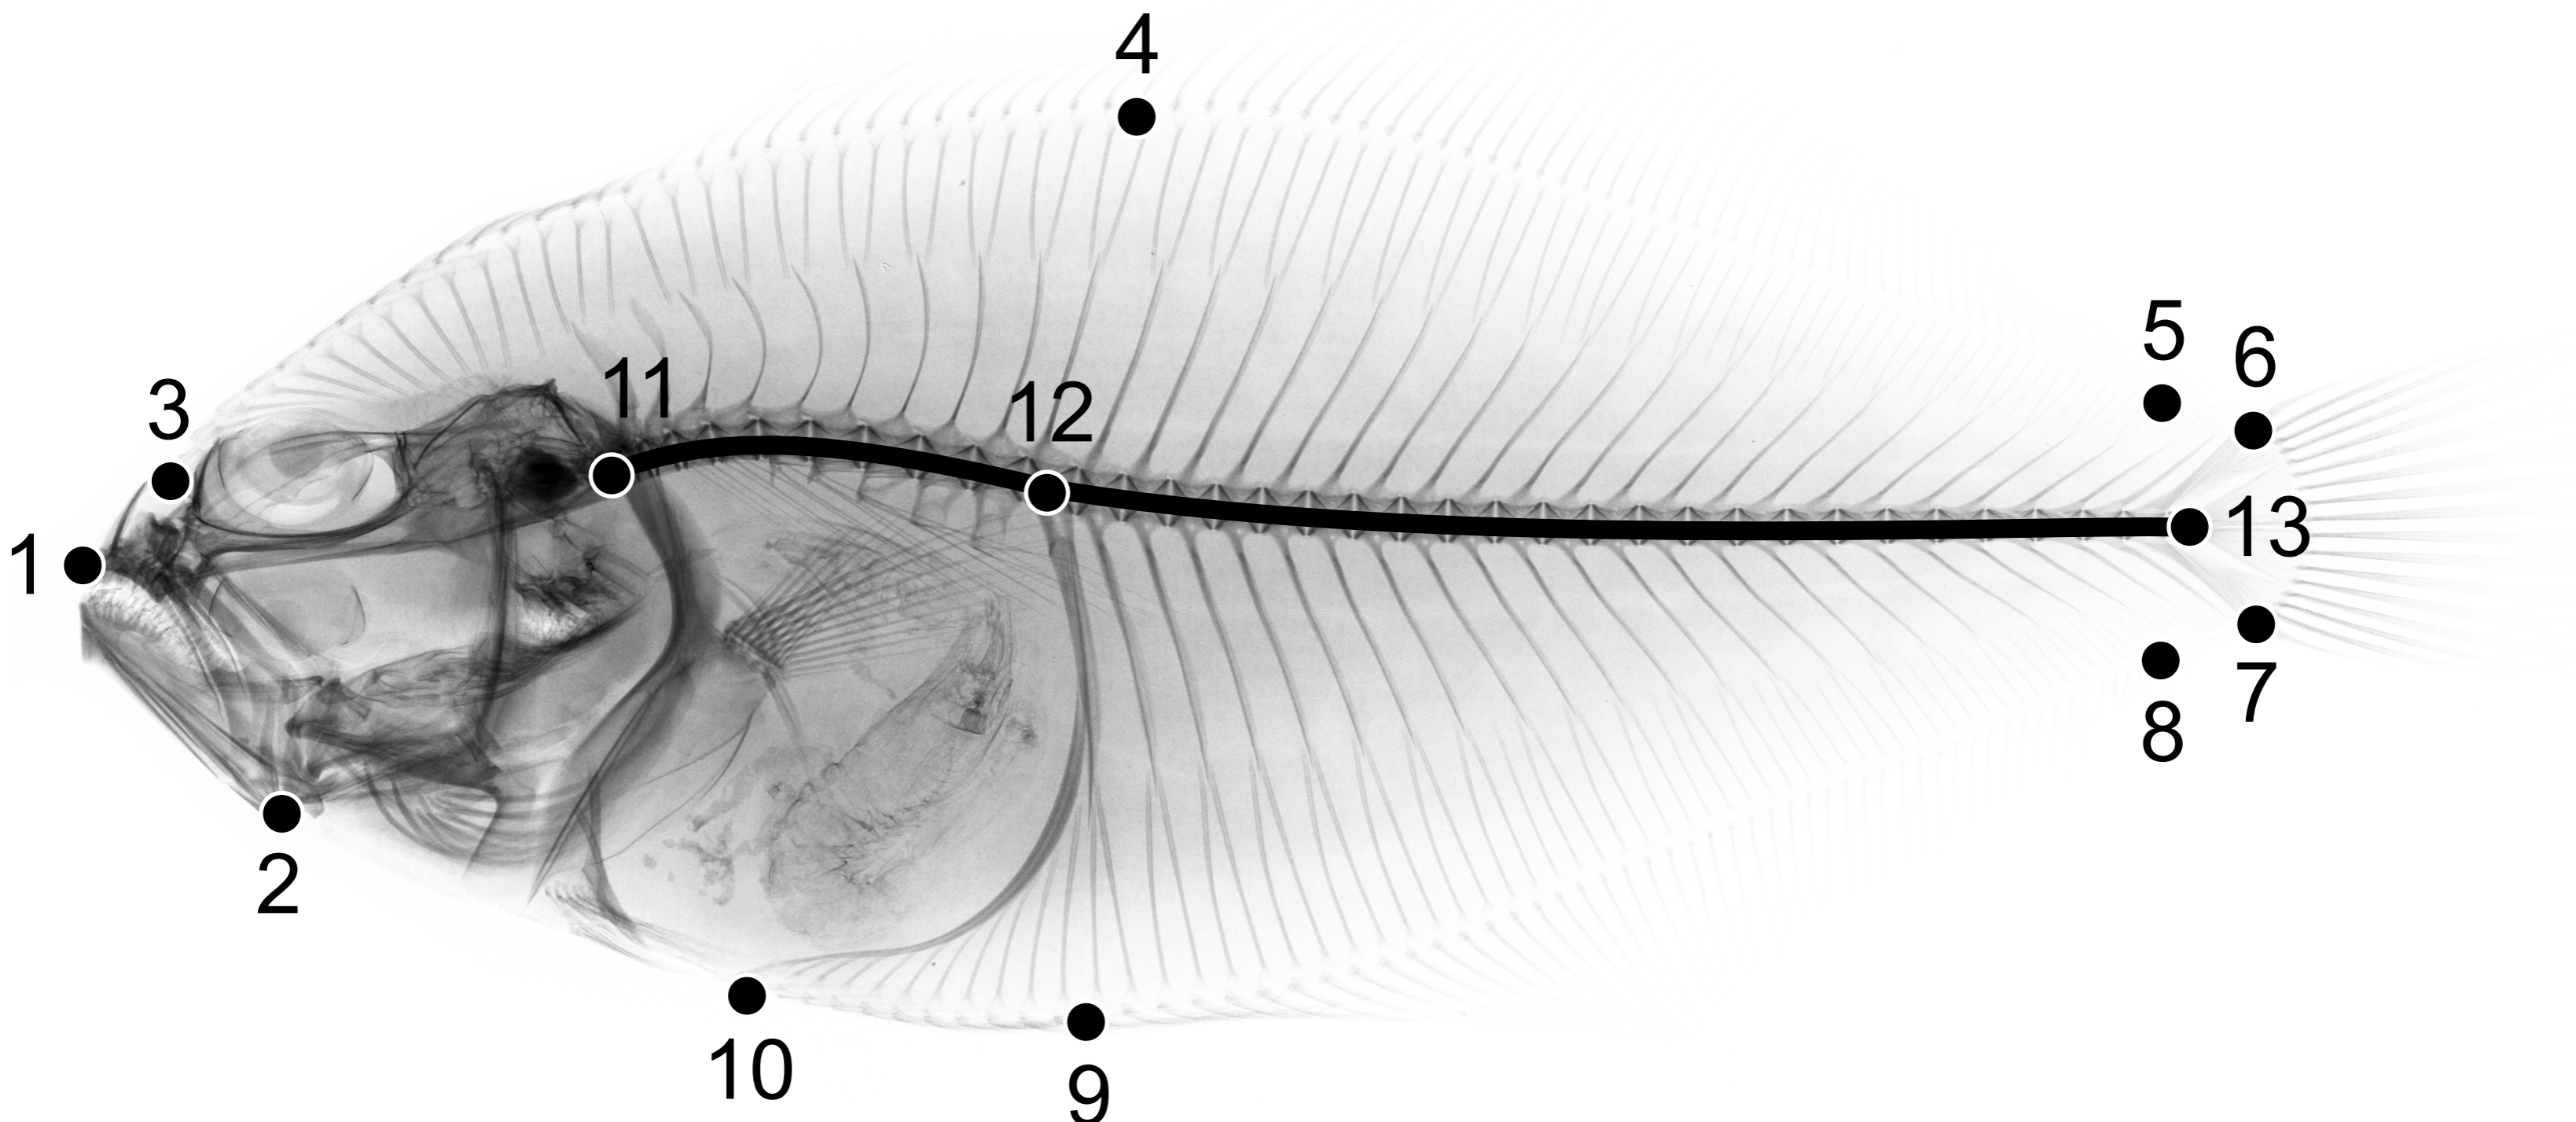

1

3

2

11

4

12

5

6

13

8

7

10

9
