# Supplementary material for: Shared ecological traits influence shape of the skeleton in flatfishes (Pleuronectiformes)
Source: PeerJ journal article supplement (doi:10.7717/peerj.8919), 2020-04-03
Supplement: Supplemental_Figure_S2.pdf [file Supplemental_Figure_S2.pdf]

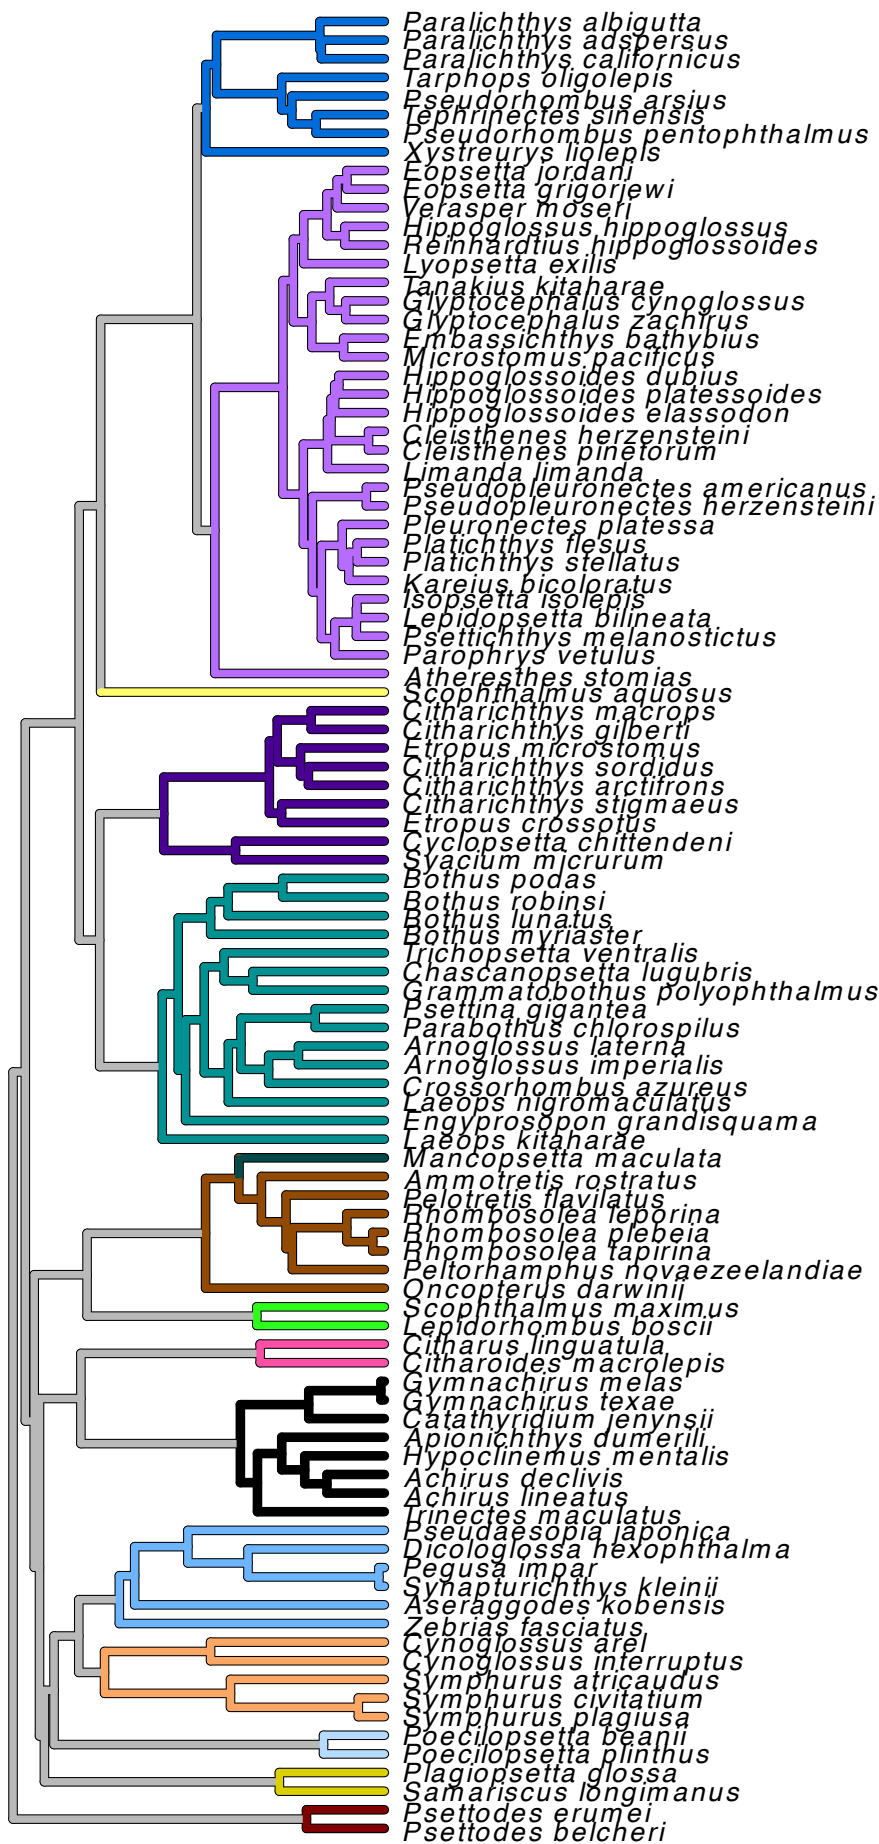

**Paralicthyidae 2**

**Pleuronectidae**

**Scophthalmidae 2**

**Paralicthyidae 1**

**Bothidae**

**Achiropsettidae**

**Rhombosoleidae**

**Scophthalmidae 1**

**Citharidae**

**Achiridae**

**Soleidae**

**Cynoglossidae**

**Poecilopsettidae**

**Samaridae**

**Psettodiidae**

*Paralicthys albigutta*  
*Paralicthys adpersus*  
*Paralicthys californicus*  
*Tarphops oligolepis*  
*Pseudorhombus arsius*  
*Lephrinectes sinensis*  
*Pseudorhombus pentophthalmus*  
*Xystreurus liolepis*  
*Eopsetta jordani*  
*Eopsetta grigorjewi*  
*Verasper moseri*  
*Hippoglossus hippoglossus*  
*Reinhardtius hippoglossoides*  
*Lyopsetta exilis*  
*Tanakius kitaharae*  
*Glyptocephalus cynoglossus*  
*Glyptocephalus zachirus*  
*Embassichthys bathybius*  
*Microstomus pacificus*  
*Hippoglossoides dubius*  
*Hippoglossoides platessoides*  
*Hippoglossoides elassodon*  
*Cleisthenes herzensteini*  
*Cleisthenes pinetorum*  
*Limanda limanda*  
*Pseudopleuronectes americanus*  
*Pseudopleuronectes herzensteini*  
*Pleuronectes platessa*  
*Platichthys flesus*  
*Platichthys stellatus*  
*Kareius bicoloratus*  
*Isopsetta isolepis*  
*Lepidopsetta bilineata*  
*Psettichthys melanostictus*  
*Parophrys vetulus*  
*Atheresthes stomias*  
*Scophthalmus aquosus*  
*Citharichthys macrops*  
*Citharichthys gilberti*  
*Etropus microstomus*  
*Citharichthys sordidus*  
*Citharichthys arctifrons*  
*Citharichthys stigmatæus*  
*Etropus crossotus*  
*Cyclopsetta chittendeni*  
*Syacium micrurum*  
*Bothus podas*  
*Bothus robinsi*  
*Bothus lunatus*  
*Bothus myriaster*  
*Trichopsetta ventralis*  
*Chascanopsetta lugubris*  
*Grammatobothus polyophthalmus*  
*Psettina gigantea*  
*Parabothus chloropilus*  
*Arnoglossus laterna*  
*Arnoglossus imperialis*  
*Crossorhombus azureus*  
*Laeops nigromaculatus*  
*Engyprosoon grandisquama*  
*Laeops kitaharæ*  
*Mancopsetta maculata*  
*Ammotretis rostratus*  
*Belotretis flavilatus*  
*Rhombosolea leporina*  
*Rhombosolea plebeia*  
*Rhombosolea tapirina*  
*Peltorhamphus novaezeelandiae*  
*Oncopterus darwinii*  
*Scophthalmus maximus*  
*Pseudorhombus boscii*  
*Citharus linguatula*  
*Citharoides macrolepis*  
*Gymnachirus melas*  
*Gymnachirus texae*  
*Catathyridium jenynsii*  
*Apionichthys dumerilii*  
*Hypoclinemus mentalis*  
*Achirus declivis*  
*Achirus lineatus*  
*Inectes maculatus*  
*Pseudaesopia japonica*  
*Dicologlossa hexophthalma*  
*Pegusa impar*  
*Synapturichthys kleinii*  
*Aseraggodes kobensis*  
*Zebrias fasciatus*  
*Cynoglossus arel*  
*Cynoglossus interruptus*  
*Symphurus atricaudus*  
*Symphurus civitatum*  
*Symphurus plagiusa*  
*Poecilopsetta beanii*  
*Poecilopsetta plinthus*  
*Plagiopsetta glossa*  
*Samariscus longimanus*  
*Psettodes erumei*  
*Psettodes belcheri*
