# Supplementary material for: Shared ecological traits influence shape of the skeleton in flatfishes (Pleuronectiformes)
Source: PeerJ journal article supplement (doi:10.7717/peerj.8919), 2020-04-03

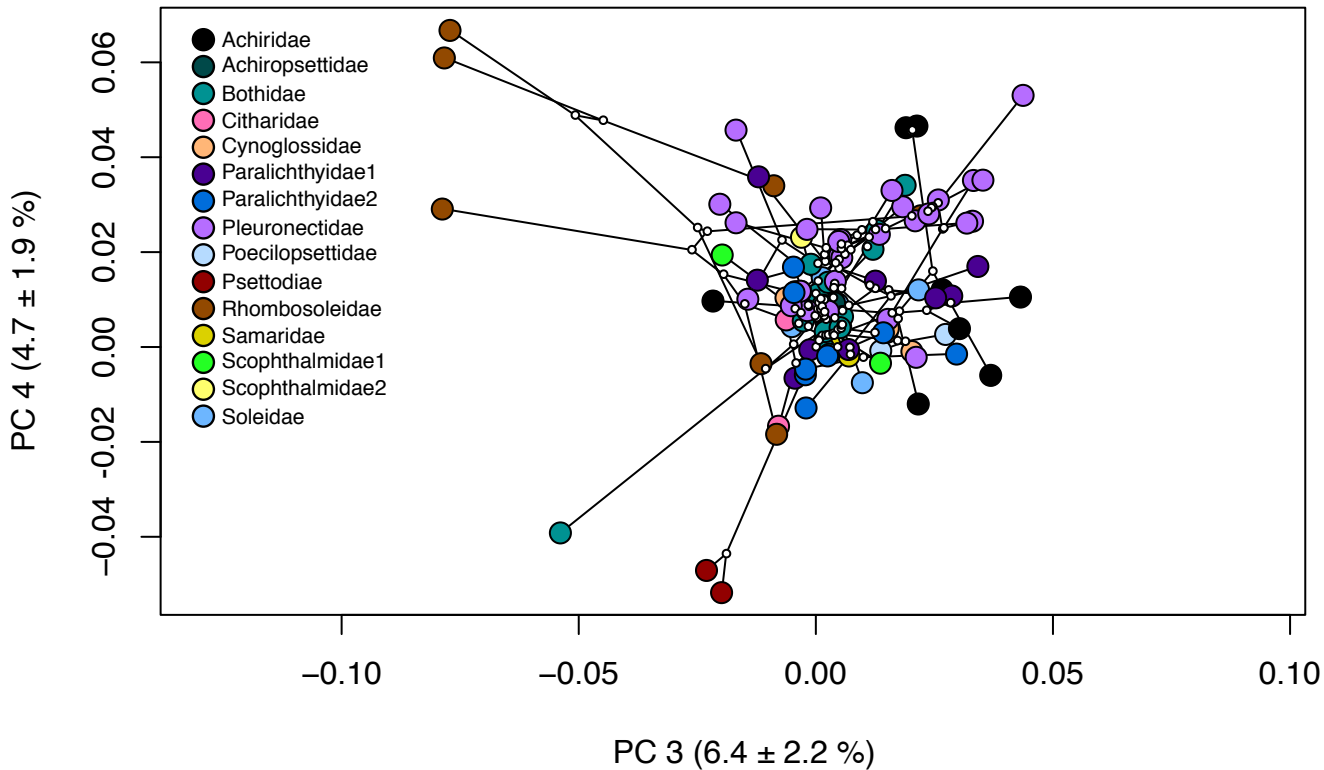

Supplement: Supplemental_Figure_S5.pdf [file Supplemental_Figure_S5.pdf]
