# Supplementary material for: Shared ecological traits influence shape of the skeleton in flatfishes (Pleuronectiformes)
Source: PeerJ journal article supplement (doi:10.7717/peerj.8919), 2020-04-03

Observed K = 0.616 ; P-value = 0.001

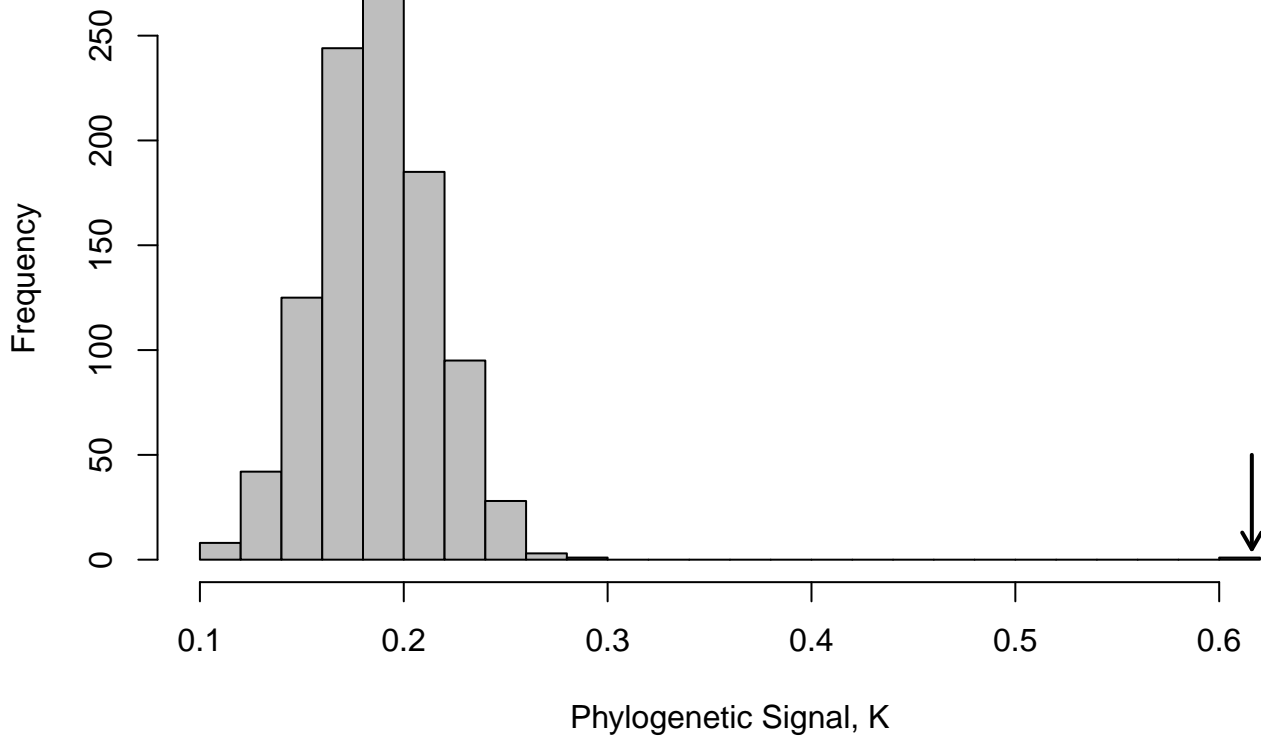

Supplement: Supplemental_Figure_S8.pdf [file Supplemental_Figure_S8.pdf]
